# Supplementary material for: mtTB: A Web-Based R/Shiny App for Pulmonary Tuberculosis Screening
Source: PubMed Central journal article supplement (PMC8982078; doi:10.3389/fcimb.2022.850279), 2022-03-18
Supplement: DataSheet_1.pdf [file DataSheet_1.pdf]

**mtTB: a web-based R/shiny app for pulmonary tuberculosis screening**

Supplementary Table 1. Clinical characteristics of two tuberculosis cohorts

| <b>Cohort</b>                  | <b>Discovery</b> | <b>Validation</b> |
|--------------------------------|------------------|-------------------|
| <b>Num. of patients</b>        | 23               | 20                |
| <b>Age in years, mean (SD)</b> |                  |                   |
| Control                        | 52.7(1.0)        | 45(1.85)          |
| Tuberculosis                   | 35(1.1)          | 38.1(2.8)         |
| <b>Males, count (%)</b>        |                  |                   |
| Control                        | 7/13(53.8)       | 6/12(50.0)        |
| Tuberculosis                   | 7/10(70)         | 5/8(62.5)         |

Supplementary Table 2. The mitochondria-derived RNA (mtRNA) signature

| <b>names</b> | <b>Sequences</b>                 | <b>Length</b> |
|--------------|----------------------------------|---------------|
| t00010700    | ACTTTTTCTCTGACCA                 | 16            |
| t00017015    | CTTTTTCTCTGACCA                  | 15            |
| t00024854    | CACTGTAAAGCTAACTTAGCATT          | 24            |
| t00013048    | TAGGATGGGGTGTGATAGG              | 19            |
| t00012442    | GGTAAAATGGCTGAGTGAAGCATTGGACTGTA | 32            |
| t00015863    | GTTTAGACGGGCTCACA                | 17            |
| t00022420    | TTTCCAAGGACACCA                  | 15            |
| t00028073    | GAGAAAGCTCACAAGAACTGCTA          | 23            |
| t00021234    | TTTTCCAAGGACACCA                 | 16            |

Supplementary Table 3. A list of mtRNAs that p-values less than 0.05 when the unpaired student t-test was evaluated

| names                  | pvalue      | Fold_change | log_FC      | FDR         |
|------------------------|-------------|-------------|-------------|-------------|
| t00017015_to_t00027940 | 0.019828154 | 8.698174684 | 3.120712683 | 0.56259193  |
| t00017015_to_t00022458 | 0.0031863   | 8.397414571 | 3.069945214 | 0.352911303 |
| t00010700_to_t00015295 | 0.045115517 | 8.192511637 | 3.034305817 | 0.568363584 |
| t00017015_to_t00027084 | 0.040165206 | 8.15445665  | 3.02758875  | 0.568363584 |
| t00006199_to_t00022458 | 0.017473241 | 7.701777916 | 2.945191523 | 0.554823009 |
| t00007970_to_t00022458 | 0.026217779 | 7.091588681 | 2.826108861 | 0.568363584 |
| t00010700_to_t00022458 | 0.001861963 | 7.072595381 | 2.822239728 | 0.286742244 |
| t00017015_to_t00022385 | 0.014281025 | 6.397756788 | 2.677566149 | 0.554823009 |
| t00017015_to_t00028073 | 0.006089253 | 6.320137718 | 2.659955996 | 0.456715016 |
| t00017015_to_t00020112 | 0.018680851 | 6.143608739 | 2.61908634  | 0.554823009 |
| t00017015_to_t00021234 | 0.000676168 | 5.964851664 | 2.576486261 | 0.173549732 |
| t00007970_to_t00014455 | 0.029557311 | 5.921470668 | 2.565955531 | 0.568363584 |
| t00006199_to_t00014005 | 0.048475335 | 5.871031697 | 2.553614046 | 0.568363584 |
| t00010700_to_t00014005 | 0.007556853 | 5.856186329 | 2.549961457 | 0.465502163 |
| t00017015_to_t00024059 | 0.000568728 | 5.853501315 | 2.549299842 | 0.173549732 |
| t00007970_to_t00014005 | 0.028154227 | 5.845095687 | 2.547226642 | 0.568363584 |
| t00006199_to_t00014455 | 0.018436861 | 5.805714535 | 2.537473637 | 0.554823009 |
| t00017015_to_t00024222 | 0.003640816 | 5.640710044 | 2.495876778 | 0.373790418 |
| t00007970_to_t00028073 | 0.04388599  | 5.350813136 | 2.419758147 | 0.568363584 |
| t00006199_to_t00028073 | 0.029282728 | 5.174407013 | 2.371393539 | 0.568363584 |
| t00017015_to_t00022420 | 0.000217317 | 5.123415546 | 2.35710591  | 0.167334077 |
| t00010700_to_t00015863 | 0.000976412 | 5.044584003 | 2.334735304 | 0.214810599 |
| t00010700_to_t00013099 | 0.026463655 | 5.016855981 | 2.326783523 | 0.568363584 |
| t00010700_to_t00014455 | 0.001388688 | 5.01524599  | 2.326320464 | 0.267322351 |
| t00017015_to_t00027162 | 0.021100326 | 5.003638524 | 2.322977569 | 0.56259193  |

|                        |             |             |             |             |
|------------------------|-------------|-------------|-------------|-------------|
| t00010700_to_t00027940 | 0.010773598 | 4.788589305 | 2.259600708 | 0.554823009 |
| t00010700_to_t00028073 | 0.007283616 | 4.78137465  | 2.257425454 | 0.465502163 |
| t00010700_to_t00029490 | 0.027200848 | 4.650162034 | 2.217280987 | 0.568363584 |
| t00017015_to_t00029490 | 0.004345642 | 4.509771706 | 2.173054403 | 0.395153564 |
| t00010700_to_t00021234 | 0.00738478  | 4.376376353 | 2.12973681  | 0.465502163 |
| t00007970_to_t00010399 | 0.039246559 | 4.18977224  | 2.06687182  | 0.568363584 |
| t00007970_to_t00013048 | 0.032615601 | 4.127378956 | 2.045225906 | 0.568363584 |
| t00010700_to_t00026687 | 0.040584108 | 4.109884503 | 2.039097852 | 0.568363584 |
| t00011350_to_t00015295 | 0.043644816 | 4.08529643  | 2.030440764 | 0.568363584 |
| t00007970_to_t00015863 | 0.045559495 | 3.973256637 | 1.990321982 | 0.568363584 |
| t00006199_to_t00015863 | 0.039071643 | 3.948439629 | 1.981282632 | 0.568363584 |
| t00006199_to_t00010399 | 0.027076571 | 3.8587788   | 1.948144345 | 0.568363584 |
| t00006199_to_t00013048 | 0.036151727 | 3.838373885 | 1.940495247 | 0.568363584 |
| t00009731_to_t00015295 | 0.046553485 | 3.77249531  | 1.915519107 | 0.568363584 |
| t00017015_to_t00026874 | 0.024743626 | 3.748701398 | 1.906390913 | 0.568363584 |
| t00010700_to_t00022420 | 0.005977228 | 3.724898815 | 1.897201236 | 0.456715016 |
| t00010700_to_t00020112 | 0.007046799 | 3.724176793 | 1.896921562 | 0.465502163 |
| t00012442_to_t00028073 | 0.002152636 | 3.655825005 | 1.870197014 | 0.301369072 |
| t00007907_to_t00022458 | 0.026433345 | 3.634345794 | 1.861695693 | 0.568363584 |
| t00007970_to_t00021234 | 0.002370796 | 3.54992164  | 1.827787179 | 0.304252208 |
| t00006199_to_t00021234 | 0.001861778 | 3.504548792 | 1.80922871  | 0.286742244 |
| t00006199_to_t00007033 | 0.021493674 | 3.496451607 | 1.805891538 | 0.56259193  |
| t00010700_to_t00016527 | 0.045627673 | 3.476695003 | 1.797716511 | 0.568363584 |
| t00010700_to_t00027162 | 0.014920757 | 3.4097354   | 1.769659789 | 0.554823009 |
| t00024854_to_t00027940 | 0.013019696 | 3.400673121 | 1.765820338 | 0.554823009 |
| t00010700_to_t00026874 | 0.041436806 | 3.363898215 | 1.750134053 | 0.568363584 |
| t00024854_to_t00028073 | 0.000585043 | 3.355708448 | 1.746617376 | 0.173549732 |
| t00007970_to_t00024222 | 0.033089292 | 3.345669421 | 1.742294902 | 0.568363584 |

|                        |             |             |             |             |
|------------------------|-------------|-------------|-------------|-------------|
| t00006199_to_t00009667 | 0.014940847 | 3.239022896 | 1.695558666 | 0.554823009 |
| t00024854_to_t00030441 | 0.029501504 | 3.217956784 | 1.686144952 | 0.568363584 |
| t00007907_to_t00014005 | 0.016838091 | 3.192303271 | 1.674597715 | 0.554823009 |
| t00007970_to_t00009667 | 0.012374964 | 3.189738619 | 1.673438208 | 0.554823009 |
| t00007970_to_t00024059 | 0.032782159 | 3.134575265 | 1.648269971 | 0.568363584 |
| t00010700_to_t00024059 | 0.018780887 | 3.123247089 | 1.64304671  | 0.554823009 |
| t00009731_to_t00022458 | 0.008305503 | 3.113899295 | 1.638722288 | 0.491941324 |
| t00006199_to_t00024222 | 0.03953429  | 3.052356409 | 1.609923429 | 0.568363584 |
| t00016493_to_t00028073 | 0.048126598 | 2.978552175 | 1.574611231 | 0.568363584 |
| t00007970_to_t00016527 | 0.027649571 | 2.928734745 | 1.550277535 | 0.568363584 |
| t00006199_to_t00022420 | 0.008732838 | 2.914359155 | 1.543178681 | 0.4980952   |
| t00007970_to_t00022420 | 0.01081026  | 2.888528247 | 1.530334603 | 0.554823009 |
| t00012442_to_t00024059 | 0.01454939  | 2.885387479 | 1.528765071 | 0.554823009 |
| t00015616_to_t00024059 | 0.011015637 | 2.873303687 | 1.522710483 | 0.554823009 |
| t00017015_to_t00024522 | 0.012173914 | 2.871626919 | 1.521868327 | 0.554823009 |
| t00007970_to_t00015882 | 0.035469957 | 2.853263722 | 1.512613099 | 0.568363584 |
| t00007907_to_t00014455 | 0.021553847 | 2.839396626 | 1.505584388 | 0.56259193  |
| t00012442_to_t00027940 | 0.006227932 | 2.820153218 | 1.495773546 | 0.456715016 |
| t00024854_to_t00027084 | 0.004934476 | 2.8031217   | 1.487034382 | 0.422171871 |
| t00009731_to_t00027940 | 0.043653671 | 2.775294378 | 1.472640807 | 0.568363584 |
| t00020738_to_t00024059 | 0.048564308 | 2.754171593 | 1.461618447 | 0.568363584 |
| t00006199_to_t00024059 | 0.047671071 | 2.751323958 | 1.460126022 | 0.568363584 |
| t00006199_to_t00016527 | 0.032946667 | 2.724576589 | 1.446032046 | 0.568363584 |
| t00015616_to_t00024222 | 0.042381086 | 2.713462532 | 1.440134988 | 0.568363584 |
| t00011350_to_t00024059 | 0.01534036  | 2.710129616 | 1.438361852 | 0.554823009 |
| t00007970_to_t00027162 | 0.016284069 | 2.550403424 | 1.350725471 | 0.554823009 |
| t00011350_to_t00028073 | 0.016676517 | 2.530100188 | 1.339194514 | 0.554823009 |
| t00007907_to_t00022420 | 0.018350393 | 2.513332155 | 1.329601347 | 0.554823009 |

|                        |             |             |              |             |
|------------------------|-------------|-------------|--------------|-------------|
| t00015616_to_t00015882 | 0.013337217 | 2.478504142 | 1.30946967   | 0.554823009 |
| t00006199_to_t00029490 | 0.038308108 | 2.454527728 | 1.295445465  | 0.568363584 |
| t00012442_to_t00013048 | 0.01476212  | 2.424873148 | 1.277909278  | 0.554823009 |
| t00007907_to_t00015863 | 0.034969116 | 2.414222906 | 1.271558887  | 0.568363584 |
| t00009731_to_t00013099 | 0.032088334 | 2.413820147 | 1.271318185  | 0.568363584 |
| t00012442_to_t00016527 | 0.021250468 | 2.35859314  | 1.237926573  | 0.56259193  |
| t00009731_to_t00015863 | 0.023079459 | 2.332031564 | 1.221587316  | 0.568363584 |
| t00009731_to_t00021234 | 0.032211728 | 2.330558061 | 1.220675455  | 0.568363584 |
| t00012442_to_t00015882 | 0.04762322  | 2.280469233 | 1.189330706  | 0.568363584 |
| t00007970_to_t00029490 | 0.034201651 | 2.260239412 | 1.176475596  | 0.568363584 |
| t00004817_to_t00028073 | 0.003208285 | 2.252945672 | 1.171812525  | 0.352911303 |
| t00012442_to_t00020112 | 0.01617914  | 2.244294356 | 1.166261909  | 0.554823009 |
| t00009731_to_t00014455 | 0.036253069 | 2.233770495 | 1.159480966  | 0.568363584 |
| t00007907_to_t00021234 | 0.02886618  | 2.22168039  | 1.151651286  | 0.568363584 |
| t00021504_to_t00028073 | 0.049252053 | 2.187972123 | 1.129594357  | 0.568363584 |
| t00006199_to_t00027162 | 0.028928261 | 2.172556654 | 1.119393799  | 0.568363584 |
| t00012442_to_t00015863 | 0.013675039 | 2.166705604 | 1.115503144  | 0.554823009 |
| t00012442_to_t00021234 | 0.004362085 | 2.164437459 | 1.113992115  | 0.395153564 |
| t00009731_to_t00010399 | 0.036212679 | 2.101179252 | 1.071199244  | 0.568363584 |
| t00011350_to_t00016527 | 0.040283003 | 2.057109918 | 1.040618884  | 0.568363584 |
| t00009731_to_t00013048 | 0.028673117 | 2.056369589 | 1.040099582  | 0.568363584 |
| t00011195_to_t00020738 | 0.034348311 | 0.42104834  | -1.247942218 | 0.568363584 |
| t00007907_to_t00010700 | 0.048230368 | 0.409151236 | -1.289293885 | 0.568363584 |
| t00005497_to_t00012442 | 0.036389062 | 0.382600402 | -1.386089704 | 0.568363584 |
| t00008082_to_t00010700 | 0.045820613 | 0.379414042 | -1.398155022 | 0.568363584 |
| t00006887_to_t00020738 | 0.04264853  | 0.345062274 | -1.535071346 | 0.568363584 |
| t00006887_to_t00010700 | 0.024884722 | 0.319417552 | -1.646484503 | 0.568363584 |
| t00004817_to_t00017015 | 0.034257163 | 0.30149757  | -1.729781719 | 0.568363584 |

|                        |             |             |              |             |
|------------------------|-------------|-------------|--------------|-------------|
| t00006414_to_t00007970 | 0.046099054 | 0.297098533 | -1.750986613 | 0.568363584 |
| t00006887_to_t00017015 | 0.027932165 | 0.295121245 | -1.760620316 | 0.568363584 |
| t00007033_to_t00011350 | 0.029057313 | 0.287019891 | -1.800777374 | 0.568363584 |
| t00015882_to_t00020738 | 0.025257214 | 0.283758745 | -1.817263241 | 0.568363584 |
| t00014455_to_t00017015 | 0.045044749 | 0.273434472 | -1.87073296  | 0.568363584 |
| t00010399_to_t00010700 | 0.000488179 | 0.269171504 | -1.893402411 | 0.173549732 |
| t00013048_to_t00017015 | 0.029327023 | 0.267957076 | -1.899926182 | 0.568363584 |
| t00013099_to_t00017015 | 0.029910501 | 0.253580349 | -1.979485147 | 0.568363584 |
| t00020112_to_t00020738 | 0.020599476 | 0.236560214 | -2.079720642 | 0.56259193  |
| t00006414_to_t00010700 | 0.013884806 | 0.234881266 | -2.089996446 | 0.554823009 |
| t00015295_to_t00017015 | 6.43E-05    | 0.232915385 | -2.102122157 | 0.099071121 |
| t00009667_to_t00017015 | 0.049029024 | 0.224460791 | -2.155464641 | 0.568363584 |
| t00003437_to_t00020738 | 0.048565667 | 0.221374077 | -2.1754418   | 0.568363584 |
| t00020494_to_t00020738 | 0.018241622 | 0.21480426  | -2.21890549  | 0.554823009 |
| t00006414_to_t00020738 | 0.042811243 | 0.210212813 | -2.25007749  | 0.568363584 |
| t00016527_to_t00020738 | 0.019094558 | 0.208694053 | -2.260538603 | 0.554823009 |
| t00014138_to_t00017015 | 0.044182221 | 0.205611302 | -2.282008523 | 0.568363584 |
| t00015295_to_t00020738 | 0.047917969 | 0.162083294 | -2.625192691 | 0.568363584 |

---
